# Supplementary material for: Genome-Wide Identification of Maize Protein Arginine Methyltransferase Genes and Functional Analysis of ZmPRMT1 Reveal Essential Roles in Arabidopsis Flowering Regulation and Abiotic Stress Tolerance
Source: MDPI journal article supplement (doi:10.3390/ijms232112793), 2022-10-24
Supplement: s1 [file s1]

## Supplementary materials

Figure S1 PCR electrophoresis of *ZmPRMT1* genes.

- (A) *ZmPRMT1* gene clone electrophoresis diagram. M1:250-I Marker, A1-2: *ZmPRMT1* gene.
- (B) Recombinant plasmid bienzyme-cut electrophoresis diagram. M2:250-III Marker, B1-2: *ZmPRMT1* gene.

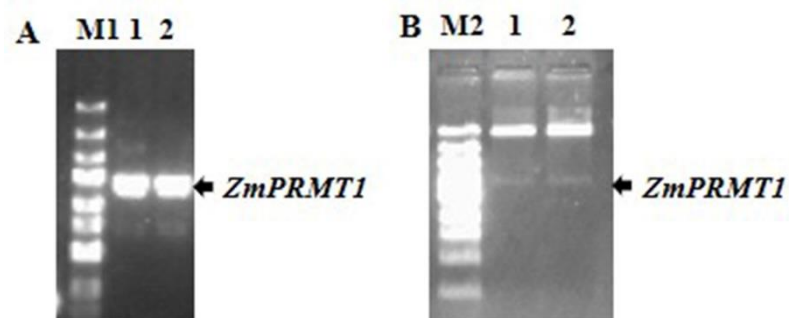

Figure S2 PCR electrophoresis of Hygromycin gene of 16 over-expression lines.

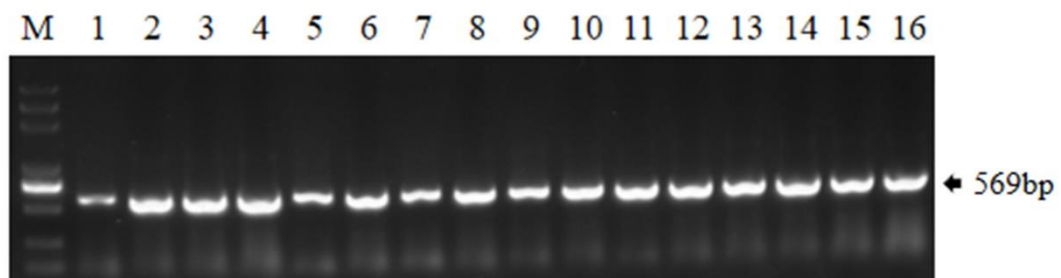

**Figure S3 Alignment of the amino acid sequences of ZmPRMT1 protein and AtPRMT5 protein.**

|           |                                           |     |
|-----------|-------------------------------------------|-----|
| ZmPRMT1   | .....MILTLCAAEETGRKLEKYAVEKN              | 23  |
| AtPRMT5   | SELTITVLMVVGAGRGPLVRASLCAAEETDRKLEKYAVEKN | 400 |
| Consensus | lqaa eet rklkvyavekn                      |     |
| ZmPRMT1   | PNAVITLFSLIKLEGWESIVTVISSDMFCWDAPERADILV  | 63  |
| AtPRMT5   | PNAVITLHNIVKMEGWEDVVTIISCTMFEFNAPQCADILV  | 440 |
| Consensus | pnav tlh l k egwe vt is dmr w ape adilv   |     |
| ZmPRMT1   | SELIGSFGDNELSPECIDGAQRFLKPDGISIPSSYTSFIQ  | 103 |
| AtPRMT5   | SELIGSFGDNELSPECIDGAQRFLKPDGISIPSSYTSFIQ  | 480 |
| Consensus | sellgsfgdnelspecldgaqrflkpdgisipssytsfiq  |     |
| ZmPRMT1   | PITASKLHDDIKAHKDLAHFETAYVVKLHRIATLAEPCQV  | 143 |
| AtPRMT5   | PITASKLYNDVKAHKDLAHFETAYVVKLHSAKLAEPCSV   | 520 |
| Consensus | pitaskl d kahkd ahfetayvvklh a lap q v    |     |
| ZmPRMT1   | FTFTHPNFSFNASNQRYIKLQFEMLEIMGSCLVHGFAGYF  | 183 |
| AtPRMT5   | FTFTHPNFSIKVNNQRYIKLQFSLPSLAGSALVHGFAGYF  | 560 |
| Consensus | ftfthpnfs nqry klqf d gs lvhgfagyf        |     |
| ZmPRMT1   | DSVLYKDVHLGIEPTATPNMFSWFPIFFPLRKEIYVPEG   | 223 |
| AtPRMT5   | DSVLYKDVHLGIEPTATPNMFSWFPIFFPLRKEVEVHED   | 600 |
| Consensus | dsvlykdvhlgiep tatpnmfswfpiffplrkp v      |     |
| ZmPRMT1   | SPIEVHFWRCCAPTQVWYEWAVITPTFSEIHNSNGRSYWV  | 263 |
| AtPRMT5   | TPLEVHFWRCCGSSKVWYEWAVSSPTFSEPHNTNGRSYWV  | 640 |
| Consensus | p evhfwrcc kvwyew v ptpsp hn ngrsywv      |     |
| ZmPRMT1   | G                                         | 264 |
| AtPRMT5   | G                                         | 641 |
| Consensus | g                                         |     |

**Figure S4 Alignment of the amino acid sequences of PRMT proteins in maize.**

|           |                                                                                    |     |
|-----------|------------------------------------------------------------------------------------|-----|
| ZmPRMT1   | .....                                                                              | 0   |
| ZmPRMT2   | .....                                                                              | 0   |
| ZmPRMT3   | MASSPDLPFNVAFSVSAAP...AAEATAAFLGATTGAPRLCLVKSQKDEAEPTVDIDLADAVFKLGPMEWLCVCDE       | 77  |
| ZmPRMT4   | MASSPDLPFNVTFSVSEAAAGPAEGATAAFLGAATGAPRLSLVKA...EAEPTVEIDLADAVFKLGPTWLCVCDE        | 77  |
| ZmPRMT5   | .....                                                                              | 0   |
| ZmPRMT6   | .....                                                                              | 0   |
| ZmPRMT7   | .....                                                                              | 0   |
| ZmPRMT8   | .....                                                                              | 0   |
| Consensus |                                                                                    |     |
| ZmPRMT1   | .....                                                                              | 0   |
| ZmPRMT2   | .....                                                                              | 0   |
| ZmPRMT3   | SEAKAGVEE.....KSFSAIKVVLRTAEASKAFSLAQWKHQVISGKAGERLENGSIASKSKFDTKI                 | 142 |
| ZmPRMT4   | SEAKDGVVEYVLNGYMLTLSSLRQKSFSAIKVVLRTAEASKAFSLAQWQHGVISGKAGERLENGSIASKSKFDTKI       | 157 |
| ZmPRMT5   | .....MLPSHLNGHSALGR.RRPRLS.....AAAGESPAAAGVEAAAP                                   | 37  |
| ZmPRMT6   | .....                                                                              | 0   |
| ZmPRMT7   | .....MFTGAAGGIGNLPRPRRRLGGIGHGGVMVSPQGQVALGAHPHLAAPP                               | 48  |
| ZmPRMT8   | .....                                                                              | 0   |
| Consensus |                                                                                    |     |
| ZmPRMT1   | .....                                                                              | 0   |
| ZmPRMT2   | .....MLMAKCRTLQENEEIGTMASE                                                         | 22  |
| ZmPRMT3   | EASSAKMYFHYYGQLLHQQNMQLQDFVRTGTYAAVMENRSDFEGRVVVDVGAGSGILSLFAAQAGARHVVAVEASEMAEN   | 222 |
| ZmPRMT4   | EASSAKMYFHYYGQLLHQQNMQLQDFVRTGTYAAVMENRSDFEGRVVVDVGAGSGILSLFAVQAGARHVVAVEASEMAPH   | 237 |
| ZmPRMT5   | LEEHDRIFYQAYSHLGIHETMIKDRVRTDAYHAAIMRHQKFIEGKVVLDVGCGTGILSVFCARAGAKRVYAVEACEIVVQ   | 117 |
| ZmPRMT6   | .....MSLLCS.....QVYAVDASDIAPQ                                                      | 19  |
| ZmPRMT7   | CTDYDVAIFYKAYSHIGVHEEMLKDHVRTSTYRNAIMHHKDLISGKVVLDVGCGTGVLISFCAFAGATRVYAVDASDIAPQ  | 128 |
| ZmPRMT8   | .....MLKDVVRTKTYQNVITQSSFLIKNKVVLDVGAGTGILSLFCAKAGAKVYAEICSQMADM                   | 60  |
| Consensus |                                                                                    |     |
| ZmPRMT1   | .....MRCWDA.PEKADILVSELIGSFGDNE.ISPECIDGAORFLKPDGISTPSSYTSFTOPT                    | 57  |
| ZmPRMT2   | G.KIHELGMKIAVLKSONNELRNQFDVLYKHMDGVTDNVERSNELVLS.IIQEELAKDLELTRLKEVLAQKGATQDAPVE   | 100 |
| ZmPRMT3   | AQRLMSGNPSLGQRITVIRGKVVEVEL.PEKADILISEPMGTLVNERMLESYVIARDRLAPDGKMFPTTGRHMAPFS      | 301 |
| ZmPRMT4   | AQRLISGNPSLGHRITVIRGKVVEEVL.PEKADILISEPMGTLVNERMLESYVIARDRLAPDGKMFPTTGRHMAPFS      | 316 |
| ZmPRMT5   | AREIVKAN.NLTDQIVVIHGRVEDVDL.EEKVDVISEWMGYMLLYESMLPSVLFARDKWLKPGGLILPSHASLYMAPVT    | 195 |
| ZmPRMT6   | AMEIVREN.ELSDKVVVLHGRIEDVDI.EEKVDVISEWMGYMLLYESMLGSVIFARDKWLKPGGLILPSHASLYMAPVT    | 97  |
| ZmPRMT7   | AMEIVREN.ELSDKVVVLHGRIEDVDI.EEKVDVISEWMGYMLLYESMLGSVIFARDKWLKPGGLILPSHASLYMAPVT    | 206 |
| ZmPRMT8   | AEQIVKSN.GYSDVITVIRGKVVEIELEVPKVDVISEWMGYFLIFENMLNTVLYARDKWLADGGVVLPRDTSRLRLTAIE   | 139 |
| Consensus | .....d.....1.....                                                                  |     |
| ZmPRMT1   | ASKLHDDIK.....AHKDTIAHFETAYVVKIHRITATAPF.....QQVRDLICVCFIGSDQIYLCHEIWLS            | 118 |
| ZmPRMT2   | TSDDAGNGQ.....EADSDTLQVKAES.....                                                   | 122 |
| ZmPRMT3   | DEYLYVEIANKALFWQQHNEFFGVDLTPLHGSAFQGYFSQFVVDAFDPR.LLISFPITYHTLDFTSMKEEELYEINIPLSFV | 380 |
| ZmPRMT4   | DEYLYVEMANKALFWQQHNEFFGVDLTPLHGSAFQGYFSQFVVDAFDPR.LLISFPITYHTLDFTSMKEEELYEINIPLSFV | 395 |
| ZmPRMT5   | NRERYEDSV.....DFWRDVYGINMSALVPLAKKFTSEETSETIGGENVISWFSVKRFDCYNFTAEEFKSITSKYKVS     | 270 |
| ZmPRMT6   | NSQRYHDSI.....YFWRDVYGIKMSSMMPLAKLCAFMESVETISGENVLTWPAVVAQVDCYTIQAQKLETITAAFKFT    | 172 |
| ZmPRMT7   | NSQRYHDSI.....YFWRDVYGIKMSSMMPLAKLCAFMESVETISGENVLTWPAVVAQVDCYTIQAQKLETITAAFKFT    | 281 |
| ZmPRMT8   | DAEYK.....                                                                         | 144 |
| Consensus |                                                                                    |     |
| ZmPRMT1   | PLLV.....                                                                          | 122 |
| ZmPRMT2   | .....                                                                              | 122 |
| ZmPRMT3   | ASVGTRVHGLACWFDVLFNGSTVQRWLTAPGSPTTHWYQLRCVLSQPLYVMAGQEITGRHLHVAHSAQSYTIYLTMSAK    | 460 |
| ZmPRMT4   | ASVGTRVHGLACWFDVLFNGSTVQRWLTAPGSPTTHWYQLRCVLSQPLYVMAGQEITGRHLHVAHSAQSYTIYLTMSAK    | 475 |
| ZmPRMT5   | SMMLGELCYSNHNLPLVF.....                                                            | 288 |
| ZmPRMT6   | SMLQGVV.....                                                                       | 179 |
| ZmPRMT7   | SMLQAPLHGFAFWDFVEFNGPVRQKSKKQPSQSLDENTQNASPSNRKRKPDVSIVLSTAPEDAPTHWQQTLLYLFEPFIEL  | 361 |
| ZmPRMT8   | .....                                                                              | 144 |
| Consensus |                                                                                    |     |
| ZmPRMT1   | .....                                                                              | 122 |
| ZmPRMT2   | .....                                                                              | 122 |
| ZmPRMT3   | MWGVGAEGGGILQTSTGKLELKEPYRISQPQSYMLPQDQQQQQQLSSLQPHGSEQQMGEGLSPGITIDQVDKDYGL       | 537 |
| ZmPRMT4   | MWGVGAEGGGILQTSTGKLELKEPYRISQPQSCVLPQDQQQQQQL.LPSLQAQGEQQMGEGLSPAFTIDQDCLN...      | 548 |
| ZmPRMT5   | .....                                                                              | 288 |
| ZmPRMT6   | .....                                                                              | 179 |
| ZmPRMT7   | NKDQIIIEGSVTISQSQ.....                                                             | 377 |
| ZmPRMT8   | .....                                                                              | 144 |
| Consensus |                                                                                    |     |

**Table S1 The information of PRMT genes in plants**

| Name            | Gene ID             |
|-----------------|---------------------|
| <i>ZmPRMT1</i>  | Zm00001d015228_T003 |
| <i>ZmPRMT2</i>  | Zm00001d054001_T001 |
| <i>ZmPRMT3</i>  | Zm00001d022469_T005 |
| <i>ZmPRMT4</i>  | Zm00001d007133_T002 |
| <i>ZmPRMT5</i>  | Zm00001d026614_T002 |
| <i>ZmPRMT6</i>  | Zm00001d032633_T001 |
| <i>ZmPRMT7</i>  | Zm00001d036131_T001 |
| <i>ZmPRMT8</i>  | Zm00001d020188_T004 |
| <i>AtPRMT1A</i> | AT2G19670.1         |
| <i>AtPRMT3</i>  | AT3G12270.1         |
| <i>AtPRMT4A</i> | AT5G49020.2         |
| <i>AtPRMT4B</i> | AT3G06930.2         |
| <i>AtPRMT5</i>  | AT4G31120.1         |
| <i>AtPRMT6</i>  | AT3G20020.1         |
| <i>AtPRMT10</i> | AT1G04870.2         |
| <i>AtPRMT11</i> | AT4G29510.1         |
| <i>OsPRMT5</i>  | LOC_Os02g04660      |
| <i>OsPRMT10</i> | LOC_Os06g05090      |
| <i>SbPRMT5</i>  | SORBI_3004G036700   |
| <i>SbPRMT10</i> | SORBI_3010G032700   |

**Table S2 The signal values for maize PRMT genes in the 60 tissues**

| Gene Name<br>Tissues    | ZmPR<br>MT1 | ZmPR<br>MT2 | ZmPR<br>MT3 | ZmPR<br>MT4 | ZmPR<br>MT5 | ZmPR<br>MT6 | ZmPR<br>MT7 | ZmPR<br>MT8 |
|-------------------------|-------------|-------------|-------------|-------------|-------------|-------------|-------------|-------------|
| <b>24H_Germinating</b>  |             |             |             |             |             |             |             |             |
| <b>Seed</b>             | 10.64       | 11.63       | 10.52       | 12.73       | 11.57       | 12.1        | 11.52       | 12.23       |
| <b>6DAS_GH_Coleop</b>   |             |             |             |             |             |             |             |             |
| <b>tile</b>             | 12.79       | 13.32       | 10.24       | 12.75       | 12.32       | 12.22       | 12.52       | 12.73       |
| <b>6DAS_GH_Primary</b>  |             |             |             |             |             |             |             |             |
| <b>Root</b>             | 12.52       | 13.25       | 10.13       | 12.6        | 11.78       | 12          | 12.29       | 12.61       |
| <b>V1_GH_Primary</b>    |             |             |             |             |             |             |             |             |
| <b>Root</b>             | 11.71       | 12.72       | 9.89        | 12.38       | 10.94       | 11.56       | 11.48       | 11.88       |
| <b>VE_Whole</b>         |             |             |             |             |             |             |             |             |
| <b>Seedling</b>         | 12.43       | 11.62       | 10.32       | 12.12       | 11.33       | 11.89       | 11.76       | 11.64       |
| <b>VE_Primary Root</b>  | 12.23       | 12.25       | 10.2        | 13.07       | 11.83       | 12.75       | 12.41       | 12.85       |
| <b>V1_Pooled Leaves</b> | 11.65       | 11.01       | 10.59       | 11.38       | 8.63        | 11.52       | 9.96        | 9.35        |
| <b>V1_Stem and</b>      |             |             |             |             |             |             |             |             |
| <b>SAM</b>              | 13.07       | 12.44       | 9.96        | 13.17       | 12.27       | 12.53       | 12.96       | 13.18       |
| <b>V4_Stem and</b>      |             |             |             |             |             |             |             |             |
| <b>SAM_R3</b>           | 12.32       | 11.71       | 10.16       | 12.41       | 11.76       | 12.12       | 11.52       | 12.18       |
| <b>V3_Stem and</b>      | 12.84       | 12.39       | 10.24       | 12.99       | 12.02       | 12.43       | 12.57       | 12.75       |

**SAM****V3\_First Leaf and**

|               |       |       |      |       |      |       |       |       |
|---------------|-------|-------|------|-------|------|-------|-------|-------|
| <b>Sheath</b> | 10.88 | 11.48 | 9.95 | 11.94 | 10.1 | 11.82 | 10.96 | 11.59 |
|---------------|-------|-------|------|-------|------|-------|-------|-------|

|                        |       |       |      |       |      |       |       |       |
|------------------------|-------|-------|------|-------|------|-------|-------|-------|
| <b>V3_Topmost Leaf</b> | 11.93 | 11.42 | 9.85 | 11.73 | 9.59 | 11.79 | 10.82 | 10.97 |
|------------------------|-------|-------|------|-------|------|-------|-------|-------|

|                     |       |       |       |      |       |       |       |       |
|---------------------|-------|-------|-------|------|-------|-------|-------|-------|
| <b>V5_Shoot Tip</b> | 12.66 | 12.32 | 10.62 | 12.7 | 12.24 | 12.55 | 12.76 | 12.57 |
|---------------------|-------|-------|-------|------|-------|-------|-------|-------|

**V5\_First**

|                  |      |      |      |       |       |       |       |       |
|------------------|------|------|------|-------|-------|-------|-------|-------|
| <b>Internode</b> | 12.5 | 12.1 | 9.86 | 12.34 | 12.01 | 12.36 | 12.21 | 12.05 |
|------------------|------|------|------|-------|-------|-------|-------|-------|

**V5\_Tip of stage-2**

|             |       |       |       |       |       |       |       |       |
|-------------|-------|-------|-------|-------|-------|-------|-------|-------|
| <b>Leaf</b> | 11.58 | 11.43 | 10.27 | 11.58 | 10.67 | 11.58 | 10.84 | 10.84 |
|-------------|-------|-------|-------|-------|-------|-------|-------|-------|

**V5\_Base of stage-2**

|             |       |       |      |       |      |       |       |       |
|-------------|-------|-------|------|-------|------|-------|-------|-------|
| <b>Leaf</b> | 12.52 | 11.47 | 10.6 | 11.93 | 11.5 | 11.78 | 11.91 | 11.56 |
|-------------|-------|-------|------|-------|------|-------|-------|-------|

**V7\_First**

|                  |       |       |       |       |       |      |       |       |
|------------------|-------|-------|-------|-------|-------|------|-------|-------|
| <b>Internode</b> | 11.83 | 11.42 | 10.21 | 12.32 | 11.13 | 12.1 | 10.84 | 11.47 |
|------------------|-------|-------|-------|-------|-------|------|-------|-------|

**V7\_Tip of stage-2**

|             |       |      |       |       |      |      |      |       |
|-------------|-------|------|-------|-------|------|------|------|-------|
| <b>Leaf</b> | 10.92 | 10.9 | 10.81 | 11.98 | 7.62 | 11.6 | 9.44 | 10.97 |
|-------------|-------|------|-------|-------|------|------|------|-------|

**V7\_Base of stage-2**

|             |       |       |       |       |       |       |       |       |
|-------------|-------|-------|-------|-------|-------|-------|-------|-------|
| <b>Leaf</b> | 12.81 | 12.01 | 10.01 | 12.64 | 12.16 | 12.07 | 11.91 | 12.14 |
|-------------|-------|-------|-------|-------|-------|-------|-------|-------|

**V9\_Fourth**

|                  |       |      |       |       |       |      |       |       |
|------------------|-------|------|-------|-------|-------|------|-------|-------|
| <b>Internode</b> | 13.07 | 12.2 | 10.55 | 12.46 | 12.34 | 12.4 | 12.36 | 12.34 |
|------------------|-------|------|-------|-------|-------|------|-------|-------|

|                       |       |       |       |       |     |       |       |       |
|-----------------------|-------|-------|-------|-------|-----|-------|-------|-------|
| <b>V9_Eighth Leaf</b> | 11.07 | 11.61 | 10.58 | 11.87 | 9.6 | 11.49 | 10.35 | 10.89 |
|-----------------------|-------|-------|-------|-------|-----|-------|-------|-------|

|                         |      |       |       |       |       |       |       |       |
|-------------------------|------|-------|-------|-------|-------|-------|-------|-------|
| <b>V9_Eleventh Leaf</b> | 11.9 | 11.72 | 10.42 | 11.92 | 10.17 | 11.76 | 10.75 | 10.66 |
|-------------------------|------|-------|-------|-------|-------|-------|-------|-------|

**V9\_Thirteenth**

|             |      |       |       |       |       |       |       |       |
|-------------|------|-------|-------|-------|-------|-------|-------|-------|
| <b>Leaf</b> | 12.2 | 11.77 | 10.11 | 12.09 | 10.88 | 11.83 | 10.71 | 10.99 |
|-------------|------|-------|-------|-------|-------|-------|-------|-------|

**V9\_Immature**

|               |       |       |       |       |      |       |       |       |
|---------------|-------|-------|-------|-------|------|-------|-------|-------|
| <b>Leaves</b> | 12.47 | 11.32 | 10.91 | 12.09 | 11.2 | 11.81 | 11.35 | 10.93 |
|---------------|-------|-------|-------|-------|------|-------|-------|-------|

**V13\_Immature**

|               |       |       |       |       |       |      |       |       |
|---------------|-------|-------|-------|-------|-------|------|-------|-------|
| <b>Tassel</b> | 12.82 | 12.45 | 11.01 | 12.91 | 12.68 | 12.7 | 12.37 | 12.74 |
|---------------|-------|-------|-------|-------|-------|------|-------|-------|

**V18\_Meiotic**

|               |       |       |      |       |       |       |       |       |
|---------------|-------|-------|------|-------|-------|-------|-------|-------|
| <b>Tassel</b> | 11.31 | 11.17 | 9.91 | 11.94 | 10.87 | 11.81 | 10.52 | 11.26 |
|---------------|-------|-------|------|-------|-------|-------|-------|-------|

**V18\_Immature**

|            |       |       |       |       |       |       |       |       |
|------------|-------|-------|-------|-------|-------|-------|-------|-------|
| <b>Cob</b> | 12.67 | 12.59 | 11.14 | 13.06 | 13.16 | 12.49 | 12.06 | 12.33 |
|------------|-------|-------|-------|-------|-------|-------|-------|-------|

**VT\_Thirteenth**

|             |       |       |       |       |       |       |      |      |
|-------------|-------|-------|-------|-------|-------|-------|------|------|
| <b>Leaf</b> | 11.49 | 11.23 | 10.64 | 11.51 | 10.31 | 11.76 | 9.96 | 9.99 |
|-------------|-------|-------|-------|-------|-------|-------|------|------|

**R1\_Pre-pollinatio**

|              |       |       |      |       |       |       |       |       |
|--------------|-------|-------|------|-------|-------|-------|-------|-------|
| <b>n Cob</b> | 12.64 | 12.28 | 10.6 | 12.19 | 12.43 | 12.33 | 12.43 | 11.97 |
|--------------|-------|-------|------|-------|-------|-------|-------|-------|

|                 |       |       |       |       |       |       |       |       |
|-----------------|-------|-------|-------|-------|-------|-------|-------|-------|
| <b>R1_Silks</b> | 12.52 | 10.74 | 11.17 | 12.04 | 12.35 | 12.45 | 12.18 | 11.45 |
|-----------------|-------|-------|-------|-------|-------|-------|-------|-------|

|                   |       |       |       |      |       |       |      |       |
|-------------------|-------|-------|-------|------|-------|-------|------|-------|
| <b>R1_Anthers</b> | 11.25 | 11.47 | 10.13 | 11.4 | 10.71 | 12.26 | 9.89 | 10.85 |
|-------------------|-------|-------|-------|------|-------|-------|------|-------|

**R1\_Innermost**

|             |       |       |      |       |      |       |       |       |
|-------------|-------|-------|------|-------|------|-------|-------|-------|
| <b>Husk</b> | 11.82 | 11.48 | 9.88 | 12.23 | 11.4 | 11.94 | 11.37 | 11.07 |
|-------------|-------|-------|------|-------|------|-------|-------|-------|

**R2\_Thirteenth**

|             |       |      |       |       |       |       |       |       |
|-------------|-------|------|-------|-------|-------|-------|-------|-------|
| <b>Leaf</b> | 11.67 | 11.4 | 10.11 | 11.88 | 10.81 | 12.02 | 10.17 | 10.79 |
|-------------|-------|------|-------|-------|-------|-------|-------|-------|

|                      |       |       |       |       |       |       |       |       |
|----------------------|-------|-------|-------|-------|-------|-------|-------|-------|
| <b>R2_Outer Husk</b> | 11.63 | 11.88 | 10.04 | 12.32 | 11.49 | 11.87 | 11.39 | 11.35 |
|----------------------|-------|-------|-------|-------|-------|-------|-------|-------|

**R2\_Innermost**

|             |       |       |       |       |       |       |       |       |
|-------------|-------|-------|-------|-------|-------|-------|-------|-------|
| <b>Husk</b> | 11.56 | 11.89 | 10.09 | 12.39 | 11.51 | 11.72 | 11.02 | 11.38 |
|-------------|-------|-------|-------|-------|-------|-------|-------|-------|

|                        |       |       |       |       |       |       |       |       |
|------------------------|-------|-------|-------|-------|-------|-------|-------|-------|
| <b>2DAP_Whole</b>      |       |       |       |       |       |       |       |       |
| <b>Seed</b>            | 12.42 | 12.18 | 10.34 | 12.23 | 12.29 | 12.42 | 12.27 | 12.05 |
| <b>4DAP_Whole</b>      |       |       |       |       |       |       |       |       |
| <b>Seed</b>            | 12.42 | 12.07 | 10.12 | 12.08 | 12.37 | 12.2  | 11.74 | 11.67 |
| <b>6DAP_Whole</b>      |       |       |       |       |       |       |       |       |
| <b>Seed</b>            | 12.13 | 12.02 | 10.15 | 12.44 | 12.34 | 12.63 | 11.38 | 11.72 |
| <b>8DAP_Whole</b>      |       |       |       |       |       |       |       |       |
| <b>Seed</b>            | 12.37 | 12.13 | 10.21 | 12.46 | 12.22 | 12.46 | 11.84 | 11.64 |
| <b>10DAP_Whole</b>     |       |       |       |       |       |       |       |       |
| <b>Seed</b>            | 12.41 | 11.95 | 10.76 | 12.71 | 12.17 | 12.57 | 12.22 | 12.23 |
| <b>12DAP_Whole</b>     |       |       |       |       |       |       |       |       |
| <b>Seed</b>            | 13.17 | 12.07 | 10.42 | 12.93 | 12.45 | 12.88 | 12.73 | 12.77 |
| <b>12DAP_Endosperm</b> | 13.57 | 12.66 | 10.76 | 12.8  | 12.73 | 13.31 | 13.38 | 13.33 |
| <b>14DAP_Whole</b>     |       |       |       |       |       |       |       |       |
| <b>Seed</b>            | 13.33 | 12.04 | 10.37 | 12.27 | 12.07 | 12.71 | 12.93 | 12.91 |
| <b>14DAP_Endosperm</b> | 13.35 | 12.5  | 10.51 | 12.22 | 12.16 | 12.94 | 13.19 | 13.16 |
| <b>16DAP_Whole</b>     |       |       |       |       |       |       |       |       |
| <b>Seed</b>            | 13.47 | 12.34 | 10.73 | 12.19 | 12.33 | 12.55 | 12.66 | 12.5  |
| <b>16DAP_Endosperm</b> | 13.71 | 12.65 | 10.75 | 12.22 | 11.91 | 12.89 | 12.99 | 13.18 |
| <b>16DAP_Embryo</b>    | 12.74 | 12.57 | 11.01 | 13.1  | 13.15 | 12.66 | 12.74 | 12.71 |
| <b>18DAP_Whole</b>     |       |       |       |       |       |       |       |       |
| <b>Seed</b>            | 13.19 | 12.19 | 10.23 | 11.99 | 11.54 | 12.27 | 12.28 | 12.55 |
| <b>18DAP_Endosperm</b> | 13.52 | 12.27 | 10.61 | 12.07 | 11.61 | 12.68 | 12.64 | 12.92 |
| <b>18DAP_Embryo</b>    | 12.56 | 12.55 | 10.83 | 13.1  | 13.14 | 12.85 | 12.76 | 12.81 |
| <b>18DAP_Pericarp</b>  | 11.94 | 11.56 | 10.64 | 12.3  | 12.01 | 12.33 | 11.29 | 11.25 |
| <b>20DAP_Whole</b>     |       |       |       |       |       |       |       |       |
| <b>Seed</b>            | 13.14 | 12.36 | 10.53 | 12.08 | 11.68 | 12.69 | 12.17 | 12.53 |
| <b>20DAP_Endosperm</b> | 13.37 | 12.52 | 10.52 | 12.06 | 11.08 | 12.94 | 12.38 | 12.79 |
| <b>20DAP_Embryo</b>    | 12.69 | 12.56 | 10.73 | 13.03 | 12.94 | 12.59 | 12.22 | 12.55 |
| <b>22DAP_Whole</b>     |       |       |       |       |       |       |       |       |
| <b>Seed</b>            | 13.19 | 12.33 | 10.28 | 12.16 | 11.61 | 12.87 | 11.58 | 12.17 |
| <b>22DAP_Endosperm</b> | 13.36 | 12.47 | 10.51 | 12.4  | 10.94 | 13.03 | 11.88 | 12.68 |
| <b>22DAP_Embryo</b>    | 12.99 | 12.76 | 11.15 | 12.75 | 13.1  | 12.83 | 11.86 | 12.12 |
| <b>24DAP_Whole</b>     |       |       |       |       |       |       |       |       |
| <b>Seed</b>            | 13    | 12.25 | 10.14 | 12.21 | 11.61 | 12.65 | 11.78 | 12.22 |
| <b>24DAP_Endosperm</b> | 13.12 | 12.14 | 10.31 | 12.09 | 10.27 | 12.58 | 11.79 | 12.29 |
| <b>24DAP_Embryo</b>    | 13.02 | 12.69 | 10.48 | 12.69 | 12.94 | 12.75 | 11.5  | 12.34 |

---

**Table S3 Primer sequences for qRT-PCR**

| <b>Gene name</b> | <b>Forward primer sequence(5' →3' )</b> | <b>Reverse primer sequence(5' →3' )</b> |
|------------------|-----------------------------------------|-----------------------------------------|
| <i>ZmPRMT1</i>   | AATCTCTGGGAGATCGAATCAC                  | ACATCCTTCTCAAAAGTCTCGT                  |
| <i>ZmPRMT2</i>   | GAAGGGTCTCCTATAGAAGTGC                  | TTCTCTGTTACAACACAAAGCG                  |
| <i>ZmPRMT3</i>   | ATTAGTGGAAGCTGGTGAGA                    | TTGCTGATGTAATAATTGCCCG                  |
| <i>ZmPRMT4</i>   | CCAGAGAAAGCTGACATACTGA                  | GTATTTCGTCAGAAAATGGAGCC                 |
| <i>ZmPRMT5</i>   | CAAGCGCTTCGATTGCTATAAT                  | GGATCCGGGAAATACAAAATGG                  |
| <i>ZmPRMT6</i>   | GCTCATTCAATTGTAACGCTTCT                 | ATGCATTCTACTTGTCCAGACA                  |
| <i>ZmPRMT7</i>   | CATCCAAACCAAGTTATCGGTC                  | TTCTGATTGGCAATGTGACTTG                  |
| <i>ZmPRMT8</i>   | TCCAGTCCCAAAAGTAGATGTC                  | CAAGCCATTTATCACGTGCATA                  |
| <i>ZmActin1</i>  | CCTCACCGACCACCTAATG                     | CCATCAGGCATCTCGTAGC                     |
| <i>AtP5CS1</i>   | AGAGTCAATGGTGGCTCGCTTAGT                | ACACGGCCGATTGGATCTTCCATA                |
| <i>AtP5CR</i>    | AAGATTCTGGTTTCTGTTGC                    | AACGGTCTGTGAAGCTAAA                     |
| <i>AtPDH</i>     | ATTTGGCAGTACAAAATGCT                    | AGGACAATGCATCTGACATA                    |
| <i>AtP5CDH</i>   | CTCAAAGCTACTCTTTGGTG                    | TCGTAGATGACTTCTCTGTG                    |
| <i>AtFLC</i>     | CCTAATTTGATCCTCAGGTTTGGG                | CCGACGAAGAAAAAGTAGATAGGCAC              |
| <i>AtFT</i>      | GAGACCCTCTTATAGTAAGCAGAGTTG             | GGGAGTTCAAGTGAAAGAACCAAAGT              |
| <i>AtSOC1</i>    | GCTCTCAGTGCTTTGTGATGC                   | AAGAACGTACTTGGAGCTGGC                   |
| <i>AtMAF1</i>    | GGAAAGAATACGTTGCTGGCAACA                | CCGTTGATGATGGTGGCTAATTGA                |
| <i>AtMAF2</i>    | GGCTCCGGAAAACCTCTACAA                   | TTCTGCAAGATCTAAGGCTTCA                  |
| <i>AtMAF3</i>    | ACAGAACTAATGATGGAGGATATGAA              | CTTCTTCCCCACCTGGCT                      |
| <i>AtMAF4</i>    | GAGCAATGTCACCGGAAAGTAG                  | CAGTCGTTGGTGATGGTGGTTA                  |
| <i>AtMAF5</i>    | AAGAGCAGTAATGTCACCGGAA                  | ACTTGAGAAGCGGGAGAGTC                    |
| <i>AtActin1</i>  | CTTGACCAAGCAGCATGAA                     | CCGATCCAGACACTGTACTTCCTT                |

**Table S4 Primer sequences for clone-PCR**

| <b>Gene name</b> | <b>Forward primer sequence(5' →3' )</b> | <b>Reverse primer sequence(5' →3' )</b> |
|------------------|-----------------------------------------|-----------------------------------------|
| <i>ZmPRMT1</i>   | CCCAAGCTTATGATTTTGACATTGC               | TGCTCTAGATTATAGACCAACCCAATAG<br>G       |
